# Supplementary material
Source: PubMed Central journal article supplement (PMC3416240)
Supplement: JB.00751-12_zjb999091763so1.pdf [file JB.00751-12_zjb999091763so1.pdf]

Supplemental Table 1--Composition of defined media tested

mM concentration of each compound

component of trace elements

M9 ammonium/sucrose M9 glutamate/mannitol GMS (glutamate/mannitol Jensen's glutamate/mannitol

|                                                     |         |         |           |         |
|-----------------------------------------------------|---------|---------|-----------|---------|
| Na <sub>2</sub> HPO <sub>4</sub>                    | 155.0   | 155.0   | 0         | 0       |
| KH <sub>2</sub> PO <sub>4</sub>                     | 44.1    | 44.1    | 0         | 0       |
| NaCl                                                | 17.1    | 17.1    | 0         | 3.4     |
| NH <sub>4</sub> Cl                                  | 9.4     | 0       | 0         | 0       |
| K <sub>2</sub> HPO <sub>4</sub>                     | 0       | 0       | 5.7       | 1.1     |
| MgSO <sub>4</sub> ·7H <sub>2</sub> O                | 1.0     | 1.0     | 0.8       | 0.8     |
| CaCl <sub>2</sub> ·2H <sub>2</sub> O                | 0.3     | 0.3     | 0.4       | 0       |
| CaHPO <sub>4</sub>                                  | 0       | 0       | 0         | 7.3     |
| FeCl <sub>3</sub> ·6H <sub>2</sub> O                | 0       | 0       | 9.2E-03   | 0.4     |
| H <sub>3</sub> BO <sub>3</sub>                      | 0       | 0       | 1.6E-04   | 1.6E-02 |
| ZnSO <sub>4</sub> ·7H <sub>2</sub> O                | 0       | 0       | 3.5E-05   | 3.5E-03 |
| CoCl <sub>2</sub> ·6H <sub>2</sub> O                | 0       | 0       | 4.2E-05   | 0       |
| CuSO <sub>4</sub> ·5H <sub>2</sub> O                | 0       | 0       | 4.0E-05   | 2.0E-03 |
| MnCl <sub>2</sub> ·4H <sub>2</sub> O                | 0       | 0       | 5.1E-03   | 2.5E-03 |
| Na <sub>2</sub> MoO <sub>4</sub> ·2H <sub>2</sub> O | 0       | 0       | 4.1E-05   | 4.1E-03 |
| sucrose                                             | 11.7    | 0       | 0         | 0       |
| glutamic acid Na salt hydrate                       | 0       | 5.9     | 5.9       | 5.9     |
| mannitol                                            | 0       | 12.0    | 27.5      | 12.0    |
| thiamine                                            | 0       | 0       | 0.1 mg/L  | 0       |
| biotin                                              | 1 mg/L  | 1 mg/L  | 0.01 mg/L | 1 mg/L  |
| NaOH                                                | 0       | 0       | 0         | 1       |
| predicted PO <sub>4</sub> buffer pH                 | 7.3-7.4 | 7.3-7.4 | N/A       | N/A     |
| pH reading of Calcofluor plate                      | >7.5    | >7.5    | 6.5-7     | 6.5-7   |

total mM concentration of each ion added in compounds listed above

M9 ammonium/sucrose M9 glutamate/mannitol GMS (glutamate/mannitol Jensen's glutamate/mannitol

|                  |       |       |         |         |
|------------------|-------|-------|---------|---------|
| PO <sub>4</sub>  | 199.1 | 199.1 | 5.7     | 8.5     |
| Na               | 327.1 | 333.0 | 5.9     | 10.3    |
| SO <sub>4</sub>  | 1.0   | 1.0   | 0.8     | 0.8     |
| K                | 44.1  | 44.1  | 11.5    | 2.3     |
| Cl               | 9.4   | 17.6  | 0.8     | 4.5     |
| Ca               | 0.3   | 0.3   | 0.4     | 7.3     |
| Mg               | 1.0   | 1.0   | 0.8     | 0.8     |
| Fe               | 0     | 0     | 9.2E-03 | 0.4     |
| BO <sub>3</sub>  | 0     | 0     | 1.6E-04 | 1.6E-02 |
| Zn               | 0     | 0     | 3.5E-05 | 3.5E-03 |
| Co               | 0     | 0     | 4.2E-05 | 0       |
| Cu               | 0     | 0     | 4.0E-05 | 2.0E-03 |
| Mn               | 0     | 0     | 5.1E-03 | 2.5E-03 |
| MoO <sub>4</sub> | 0     | 0     | 4.1E-05 | 4.1E-03 |
| NH <sub>4</sub>  | 9.4   | 0     | 0       | 0       |

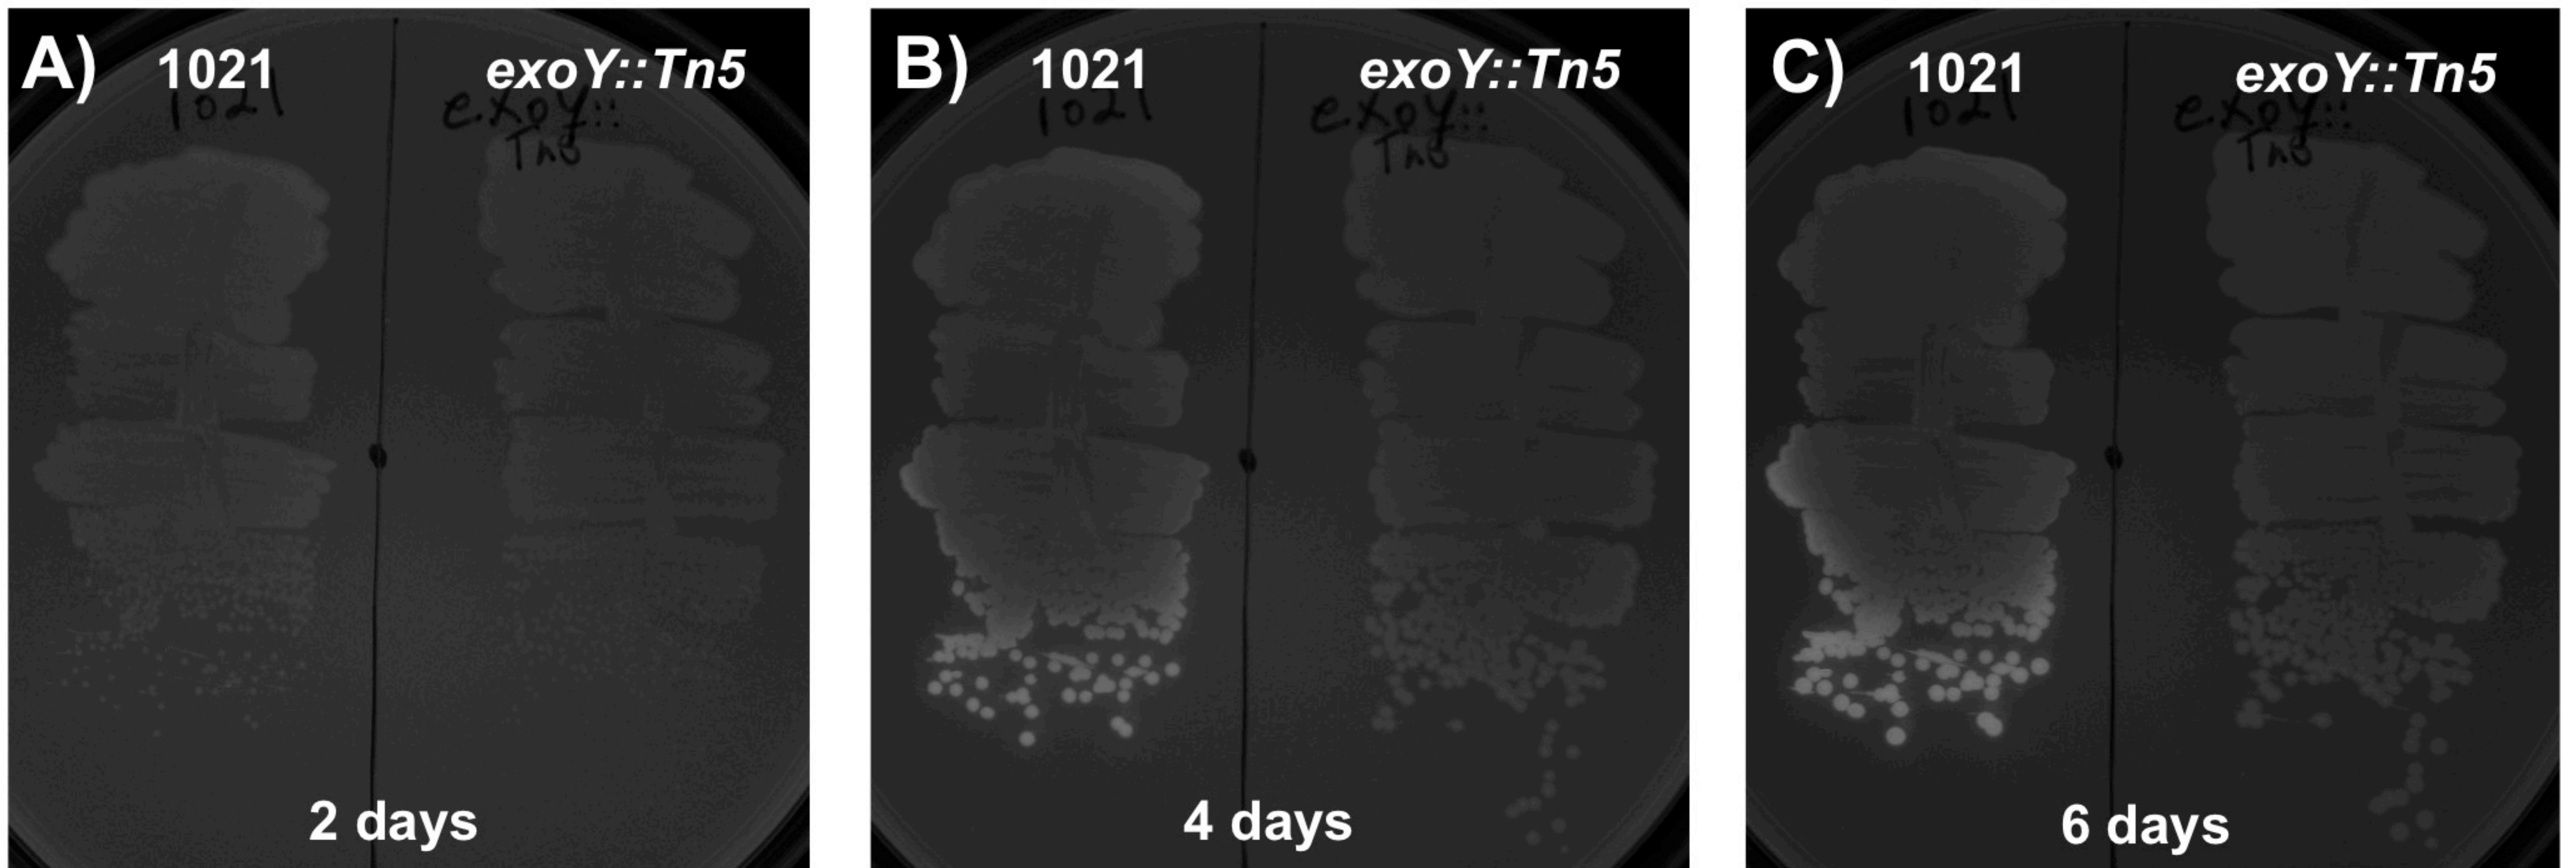

**Supplemental Figure 1. Time-series of the development of Calcofluor fluorescence.**

Binding of succinoglycan to the dye Calcofluor White M2R produces fluorescence when excited with UV light. Fluorescence from the *S. meliloti* 1021 reference strain and from the *exoY::Tn5* mutant is shown at A) 2 days; B) 4 days; C) 6 days after streaking to an LBMC 500  $\mu\text{g}/\text{mL}$  streptomycin, 0.02% Calcofluor plate. Fluorescence is apparent from *S. meliloti* 1021 after 4 days, but not from the *exoY::Tn5* mutant, which cannot make succinoglycan. All exposures were 0.5 seconds on a 302 nm UV light box.

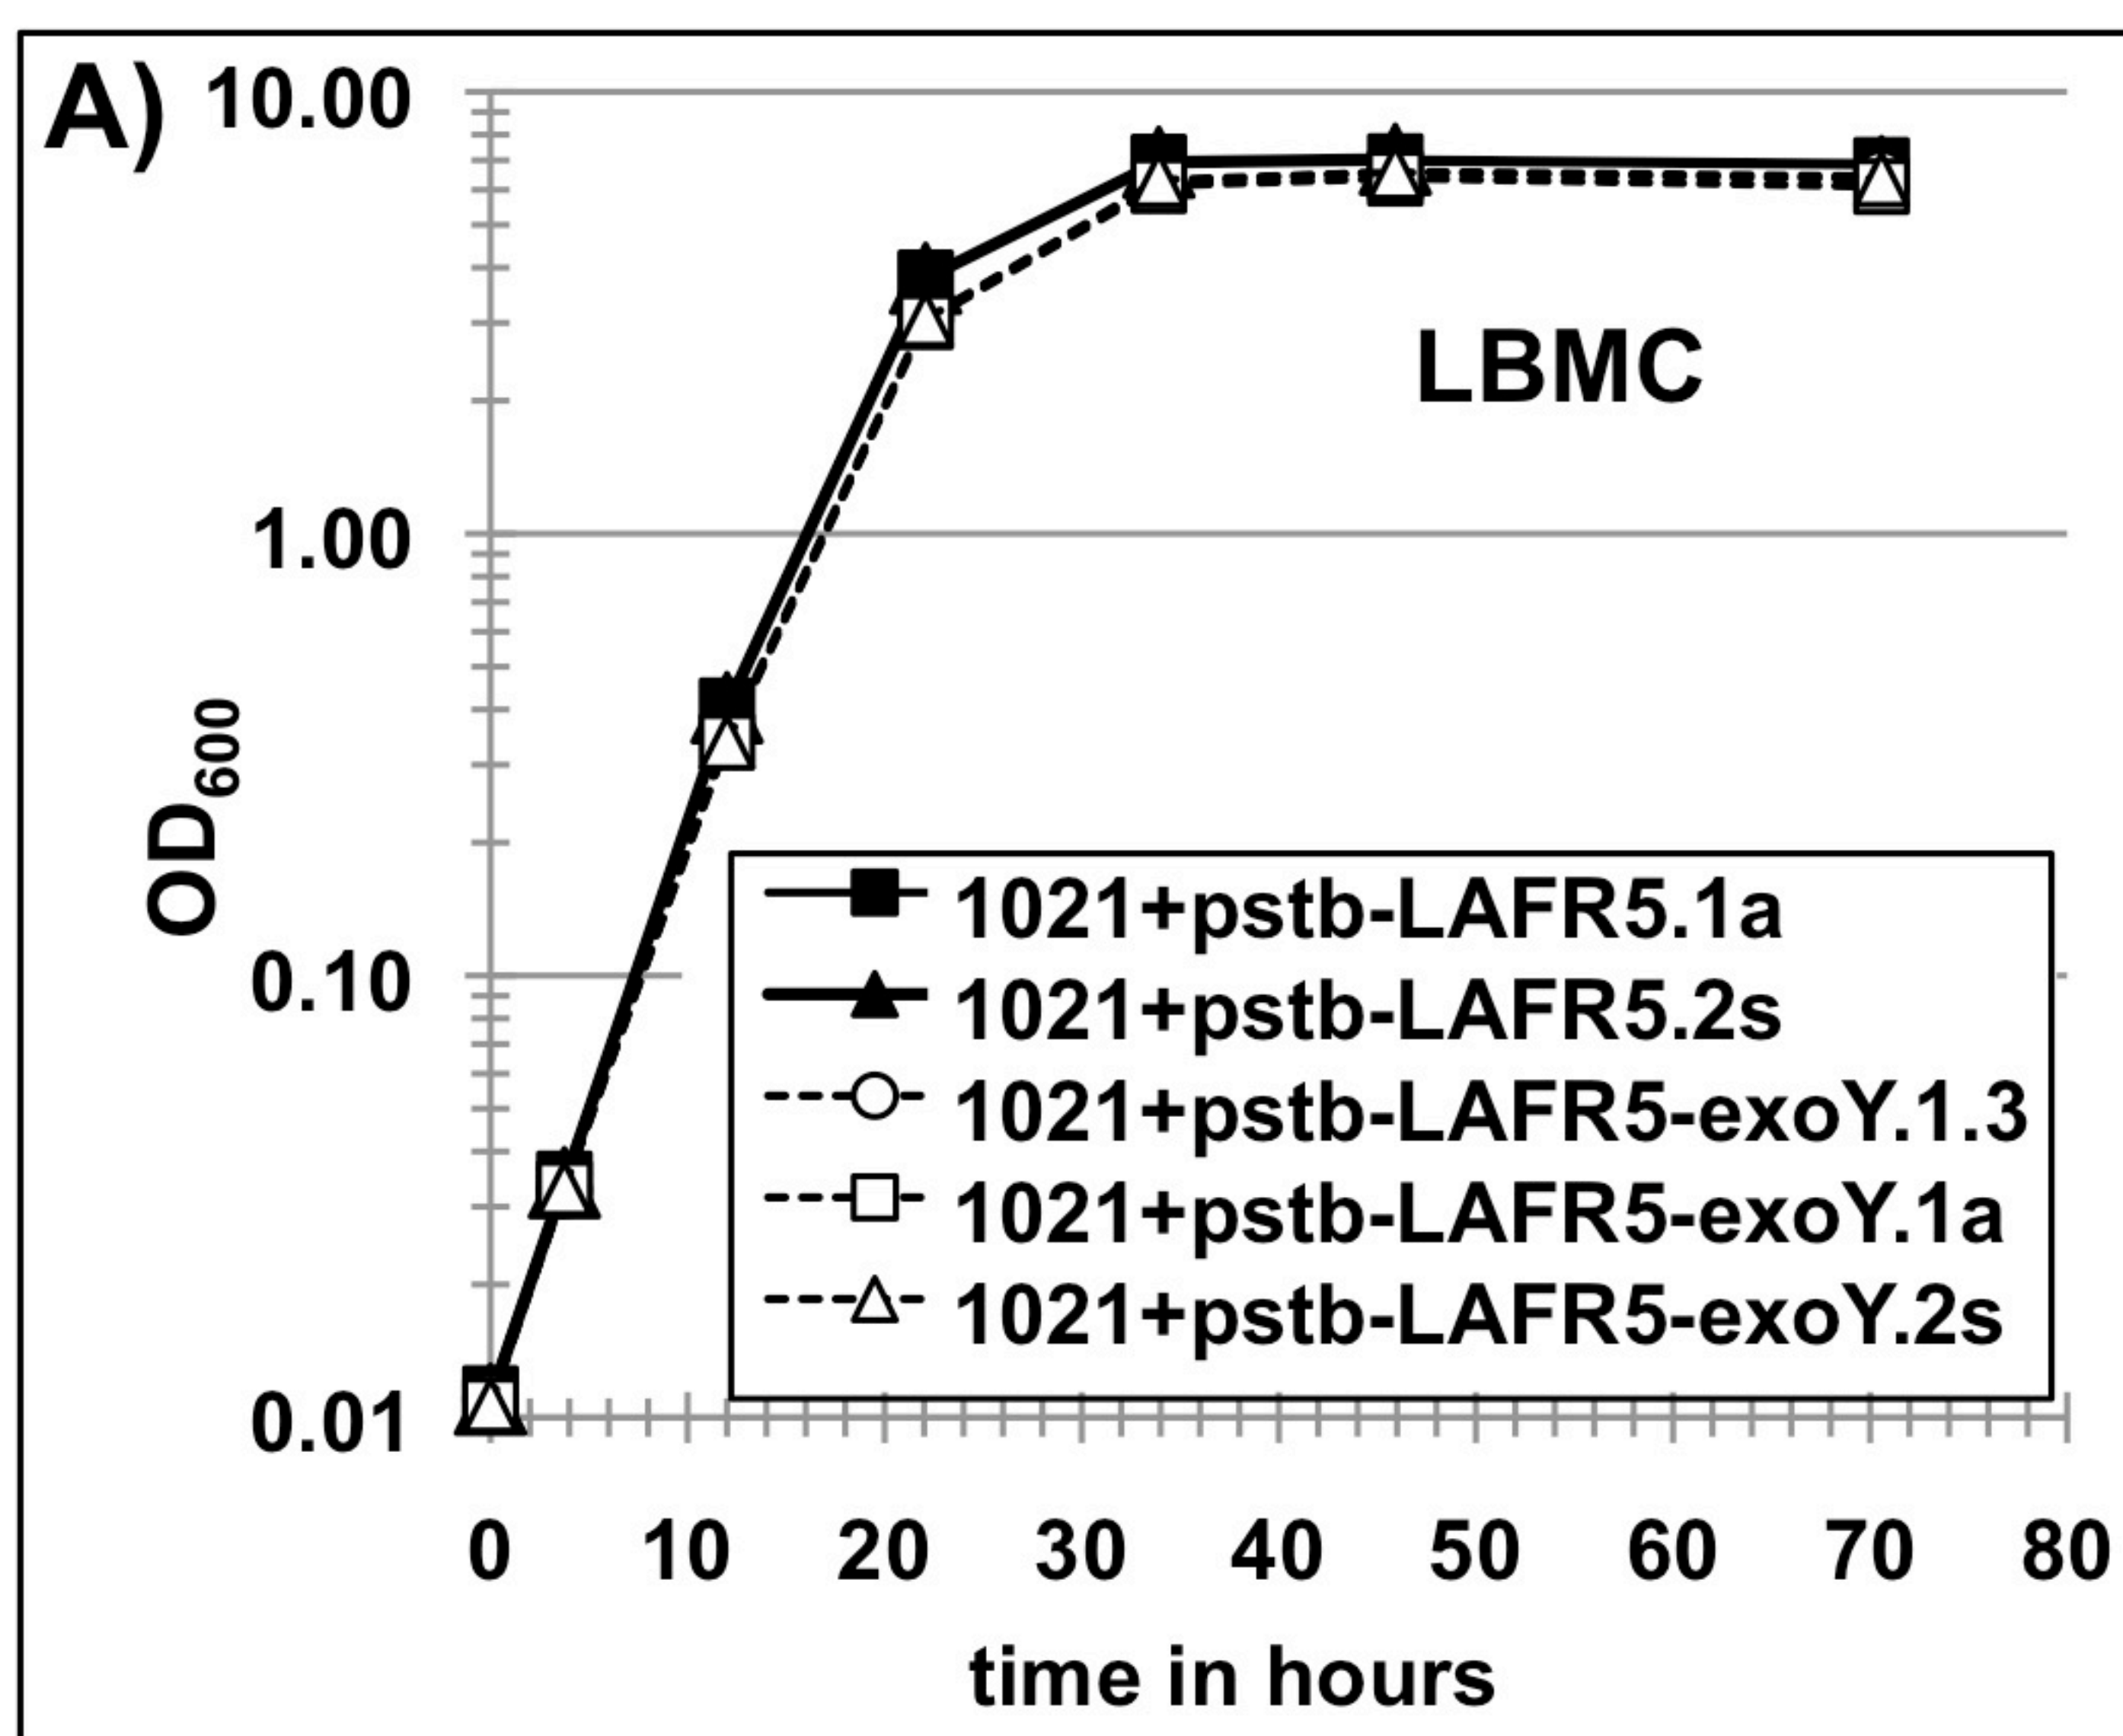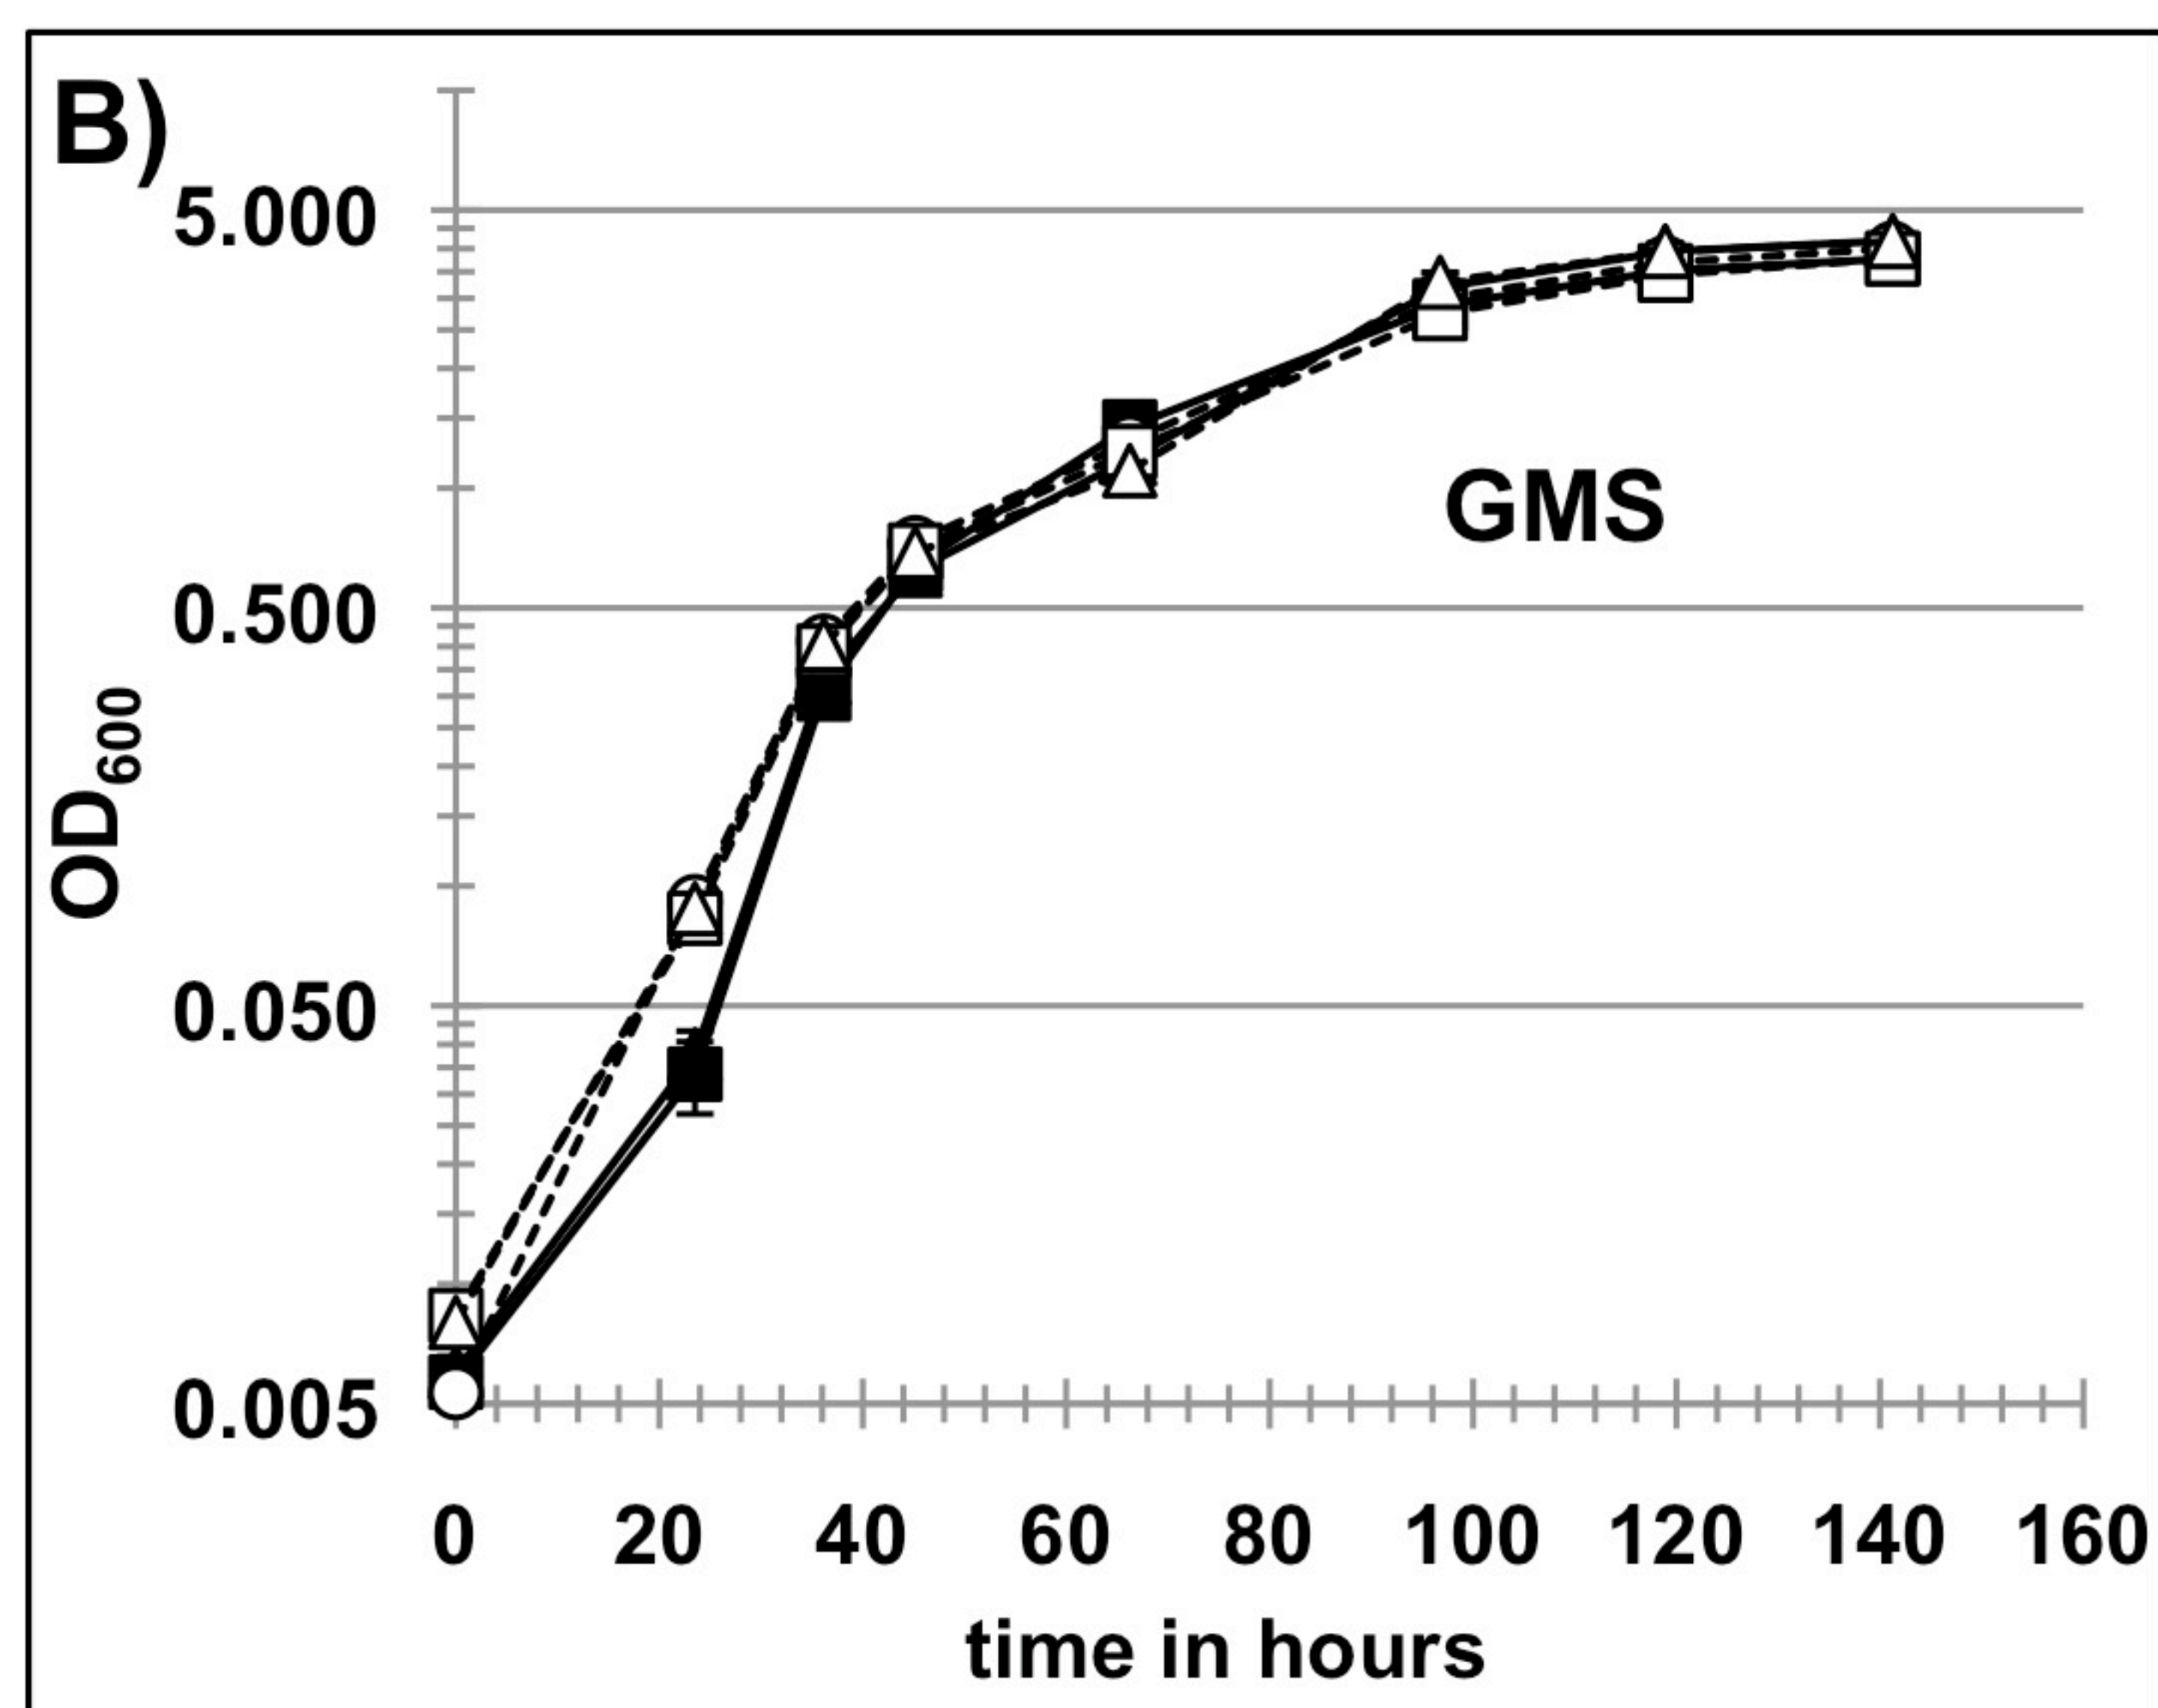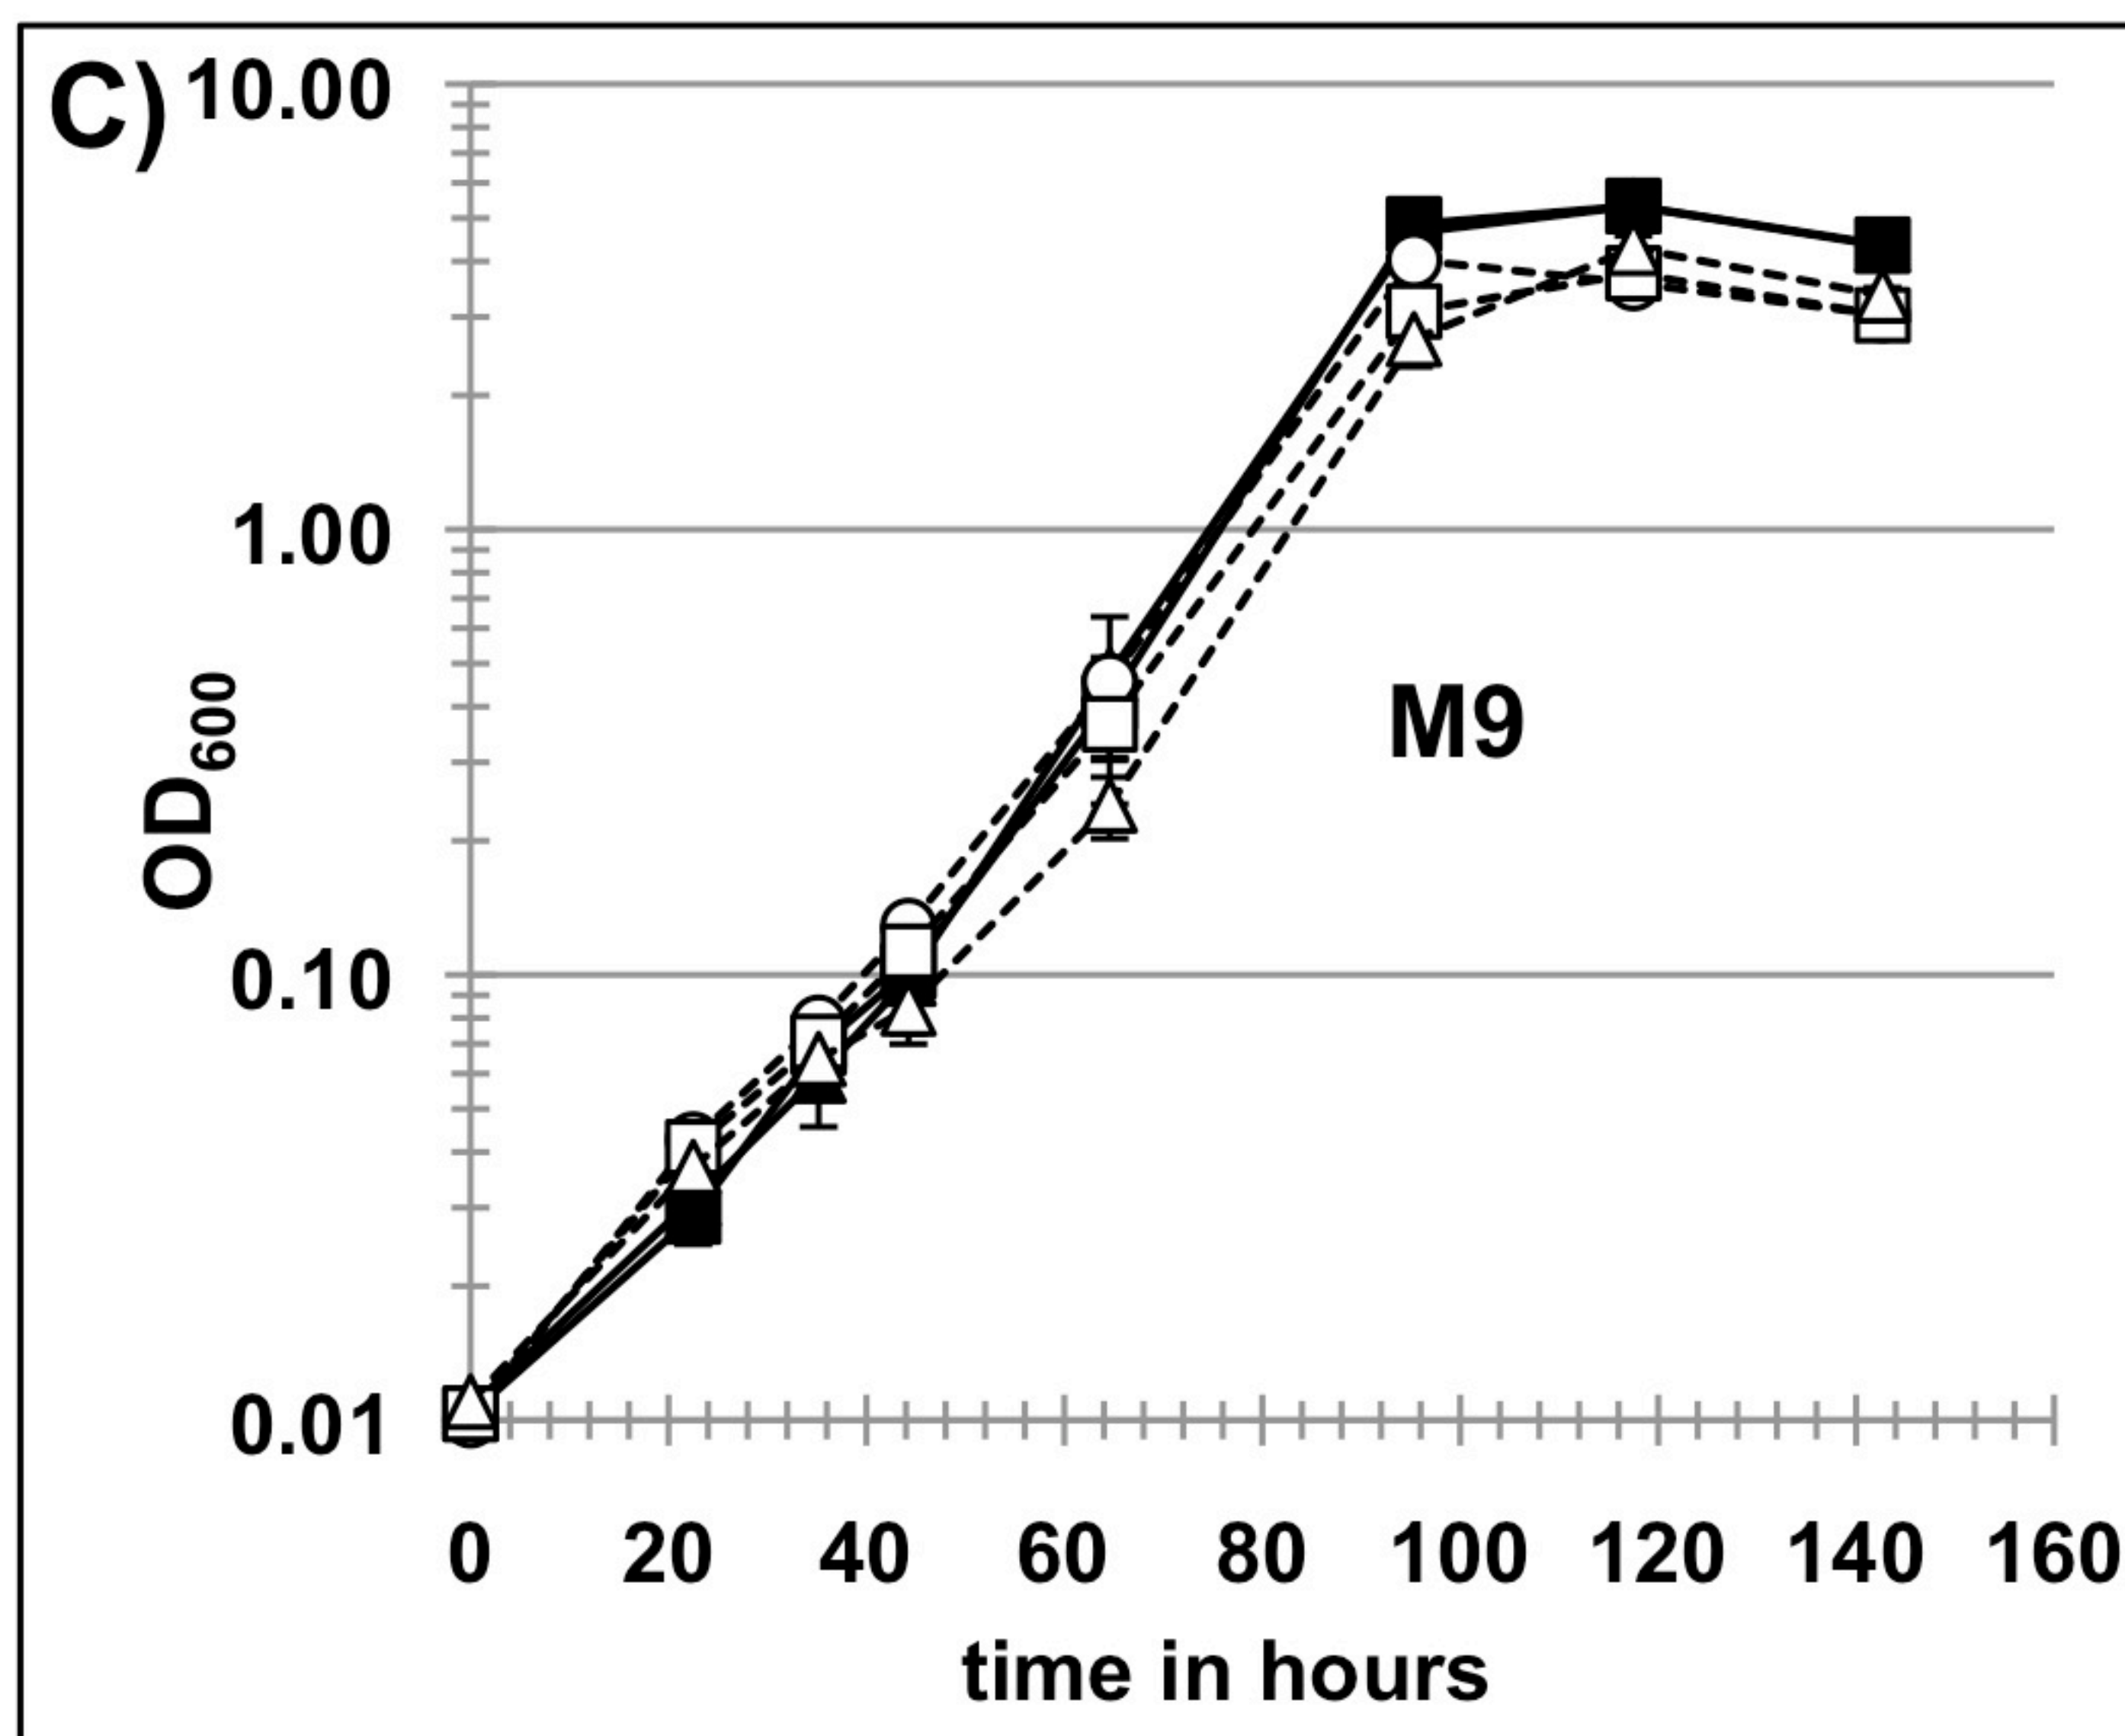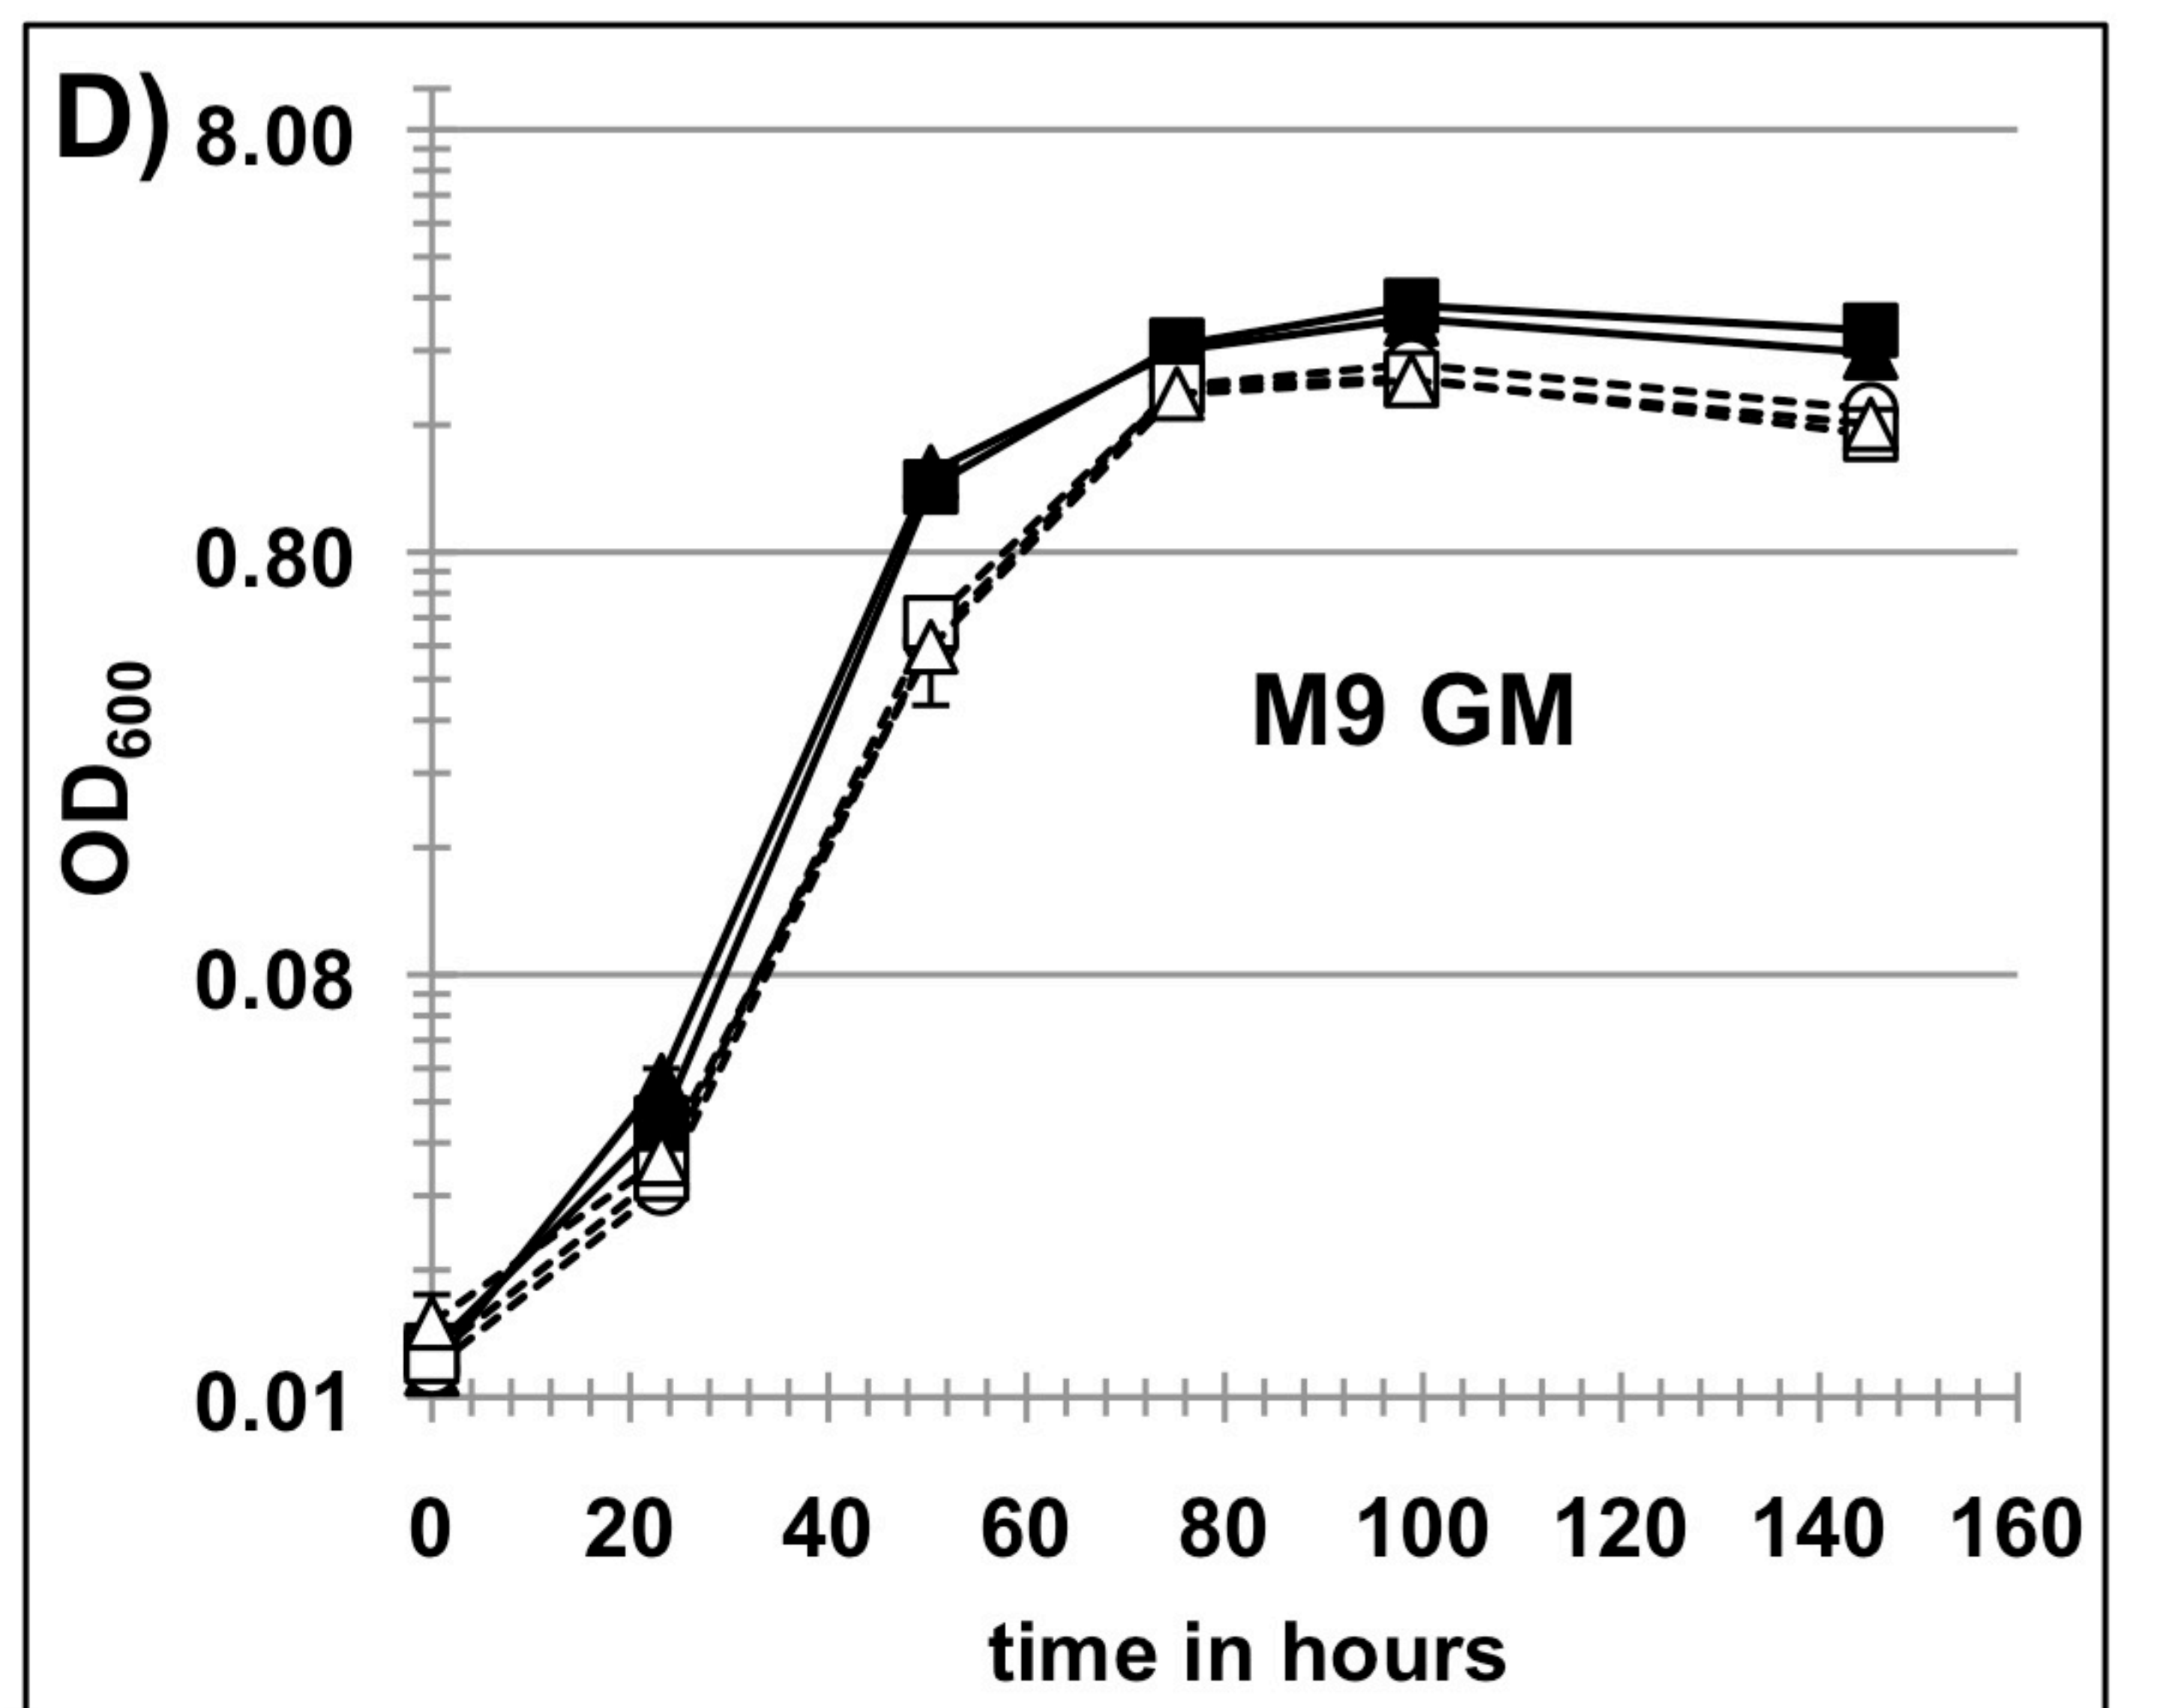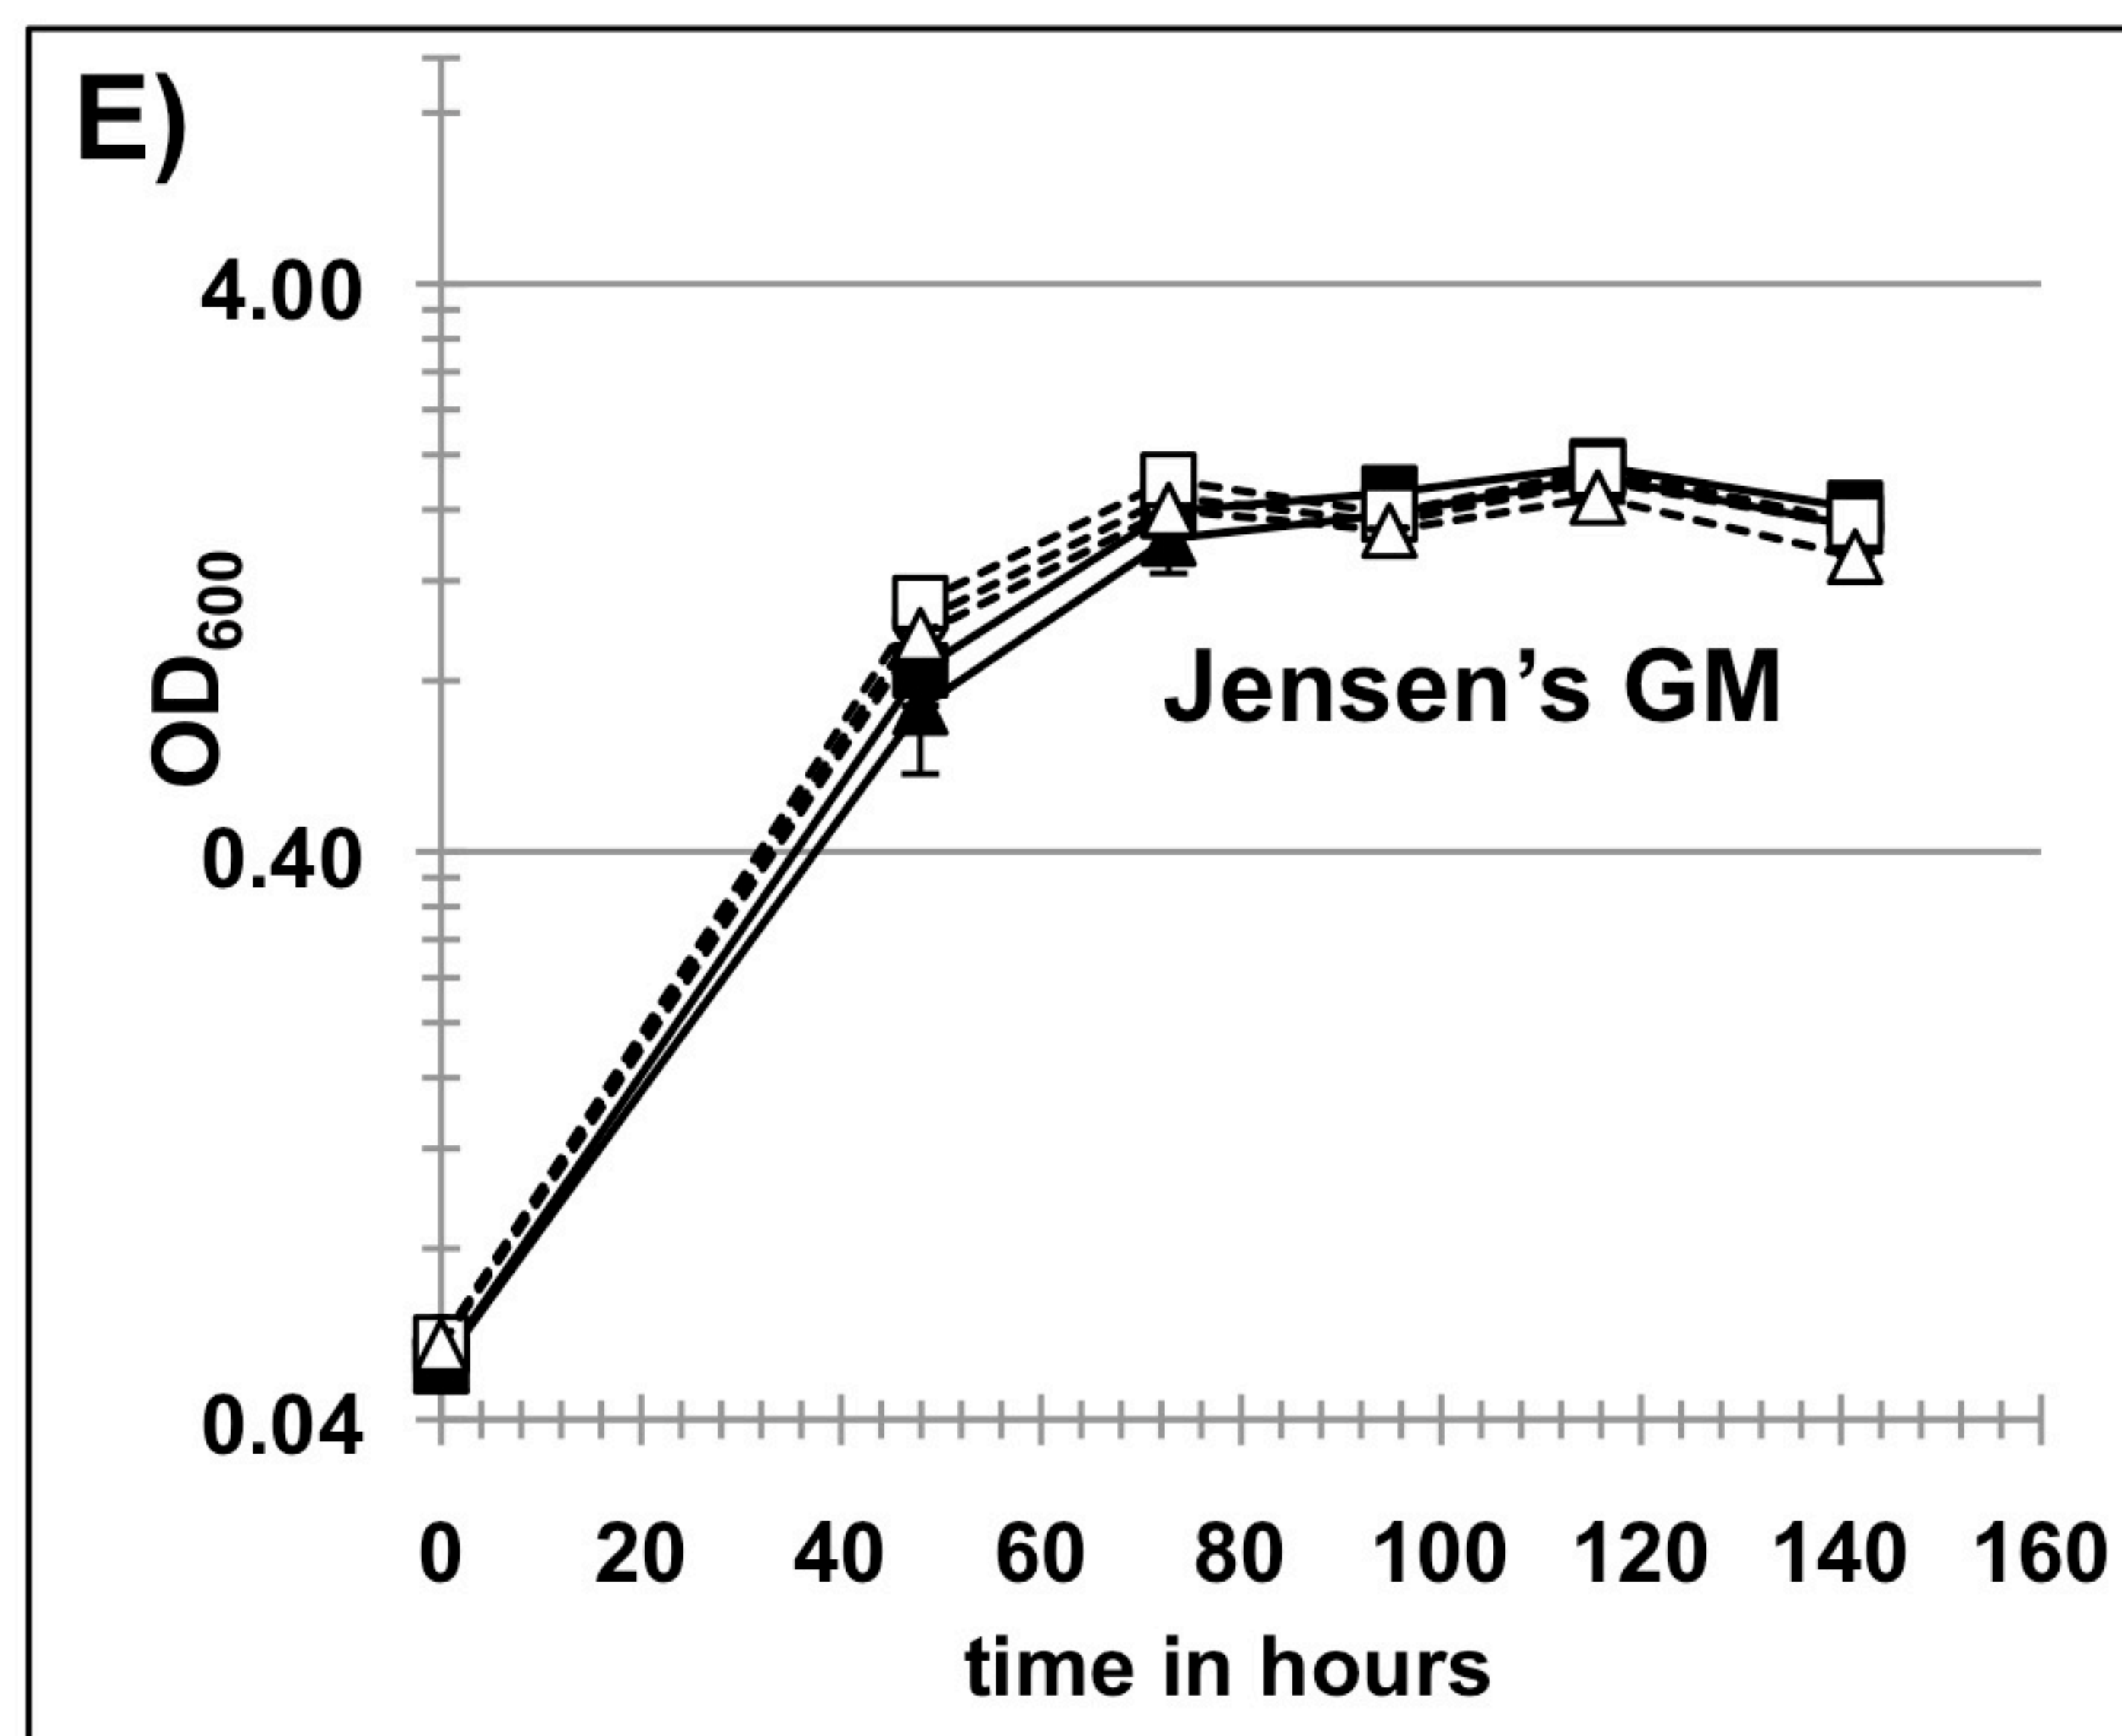

**Supplemental Figure 2. Growth of strains overexpressing *exoY* relative to control strains.** Growth of *S. meliloti* 1021 strains carrying the *pstb-LAFR5-exoY* expression plasmid (open symbols) grow as well as strains carrying the *pstb-LAFR5* negative control construct (closed symbols) on A) LBMC medium; B) GMS medium and E) Jensen's GM medium, indicating that under these conditions the diversion of resources to exopolysaccharide production does not retard growth. However, growth of the strains carrying the *pstb-LAFR5-exoY* expression plasmid is slowed on C) M9 salts medium and on D) M9 GM medium. This is consistent with the reduced growth observed for *exoY*-overexpressing strains grown on M9 and M9 GM plates (Figure 1).
